# Supplementary material for: Superparamagnetic γ-Fe2O3@SiO2 nanoparticles: a novel support for the immobilization of [VO(acac)2]
Source: Royal Society of Chemistry journal article supplement (doi:10.1039/b920853d), 2010-01-01
Supplement: b920853d.pdf [file b920853d.pdf]

## Electronic Supplementary Information

### Superparamagnetic $\gamma\text{-Fe}_2\text{O}_3@\text{SiO}_2$ nanoparticles: a novel support for the immobilization of $[\text{VO}(\text{acac})_2]$

Clara Pereira, André M. Pereira, Pedro Quaresma, Pedro B. Tavares, Eulália Pereira,  
João P. Araújo and Cristina Freire

**Figure S1.** EDS spectra of (A)  $\gamma\text{-Fe}_2\text{O}_3$ , (B)  $\gamma\text{-Fe}_2\text{O}_3@\text{SiO}_2\text{-1}$  and (C)  $\gamma\text{-Fe}_2\text{O}_3@\text{SiO}_2\text{-2}$  nanomaterials (inset: atomic percentages of Fe, O and Si), obtained during SEM experiments.

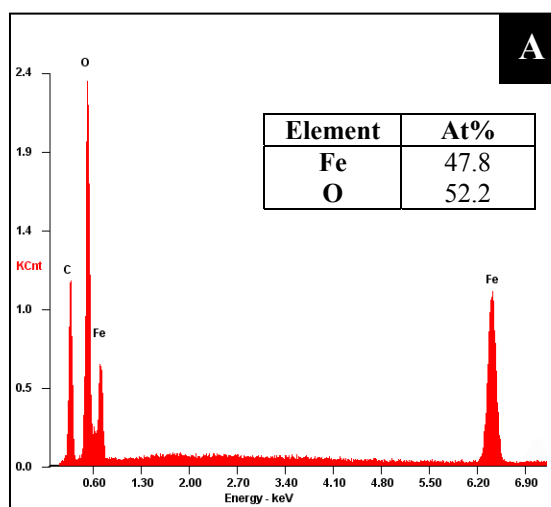

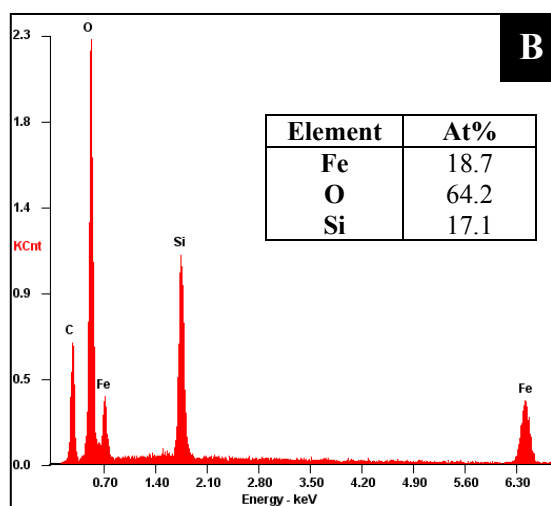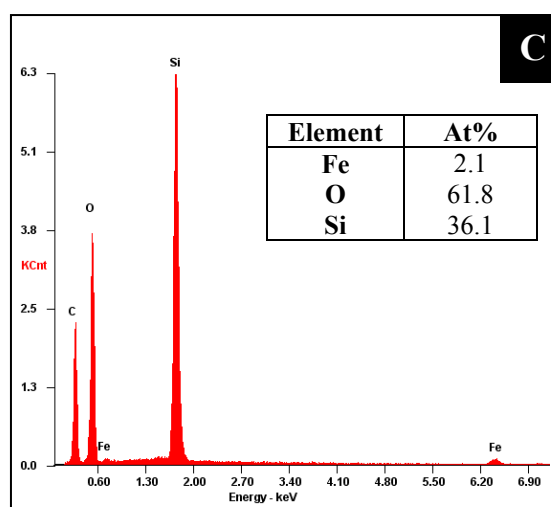

**Figure S2.** FTIR spectra of (a)  $\gamma$ -Fe<sub>2</sub>O<sub>3</sub>, (b)  $\gamma$ -Fe<sub>2</sub>O<sub>3</sub>@SiO<sub>2</sub>-1 and (c)  $\gamma$ -Fe<sub>2</sub>O<sub>3</sub>@SiO<sub>2</sub>-2 nanomaterials.

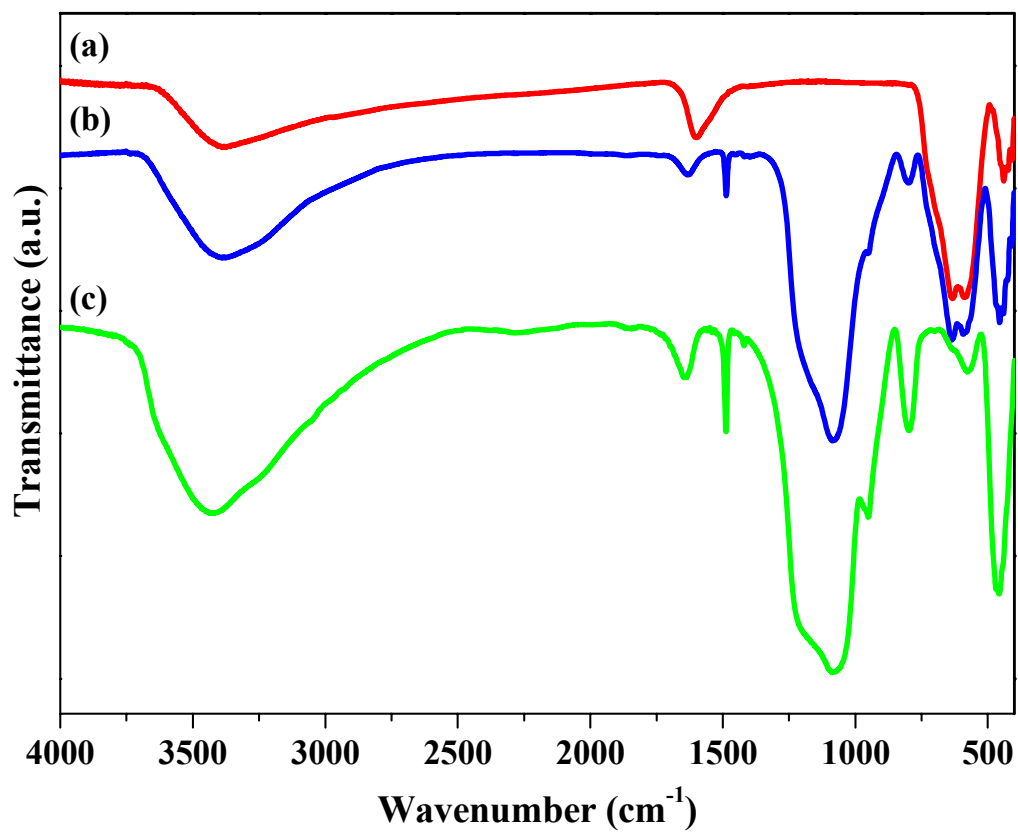

**Figure S3.** FTIR spectra of (a)  $\gamma\text{-Fe}_2\text{O}_3@\text{SiO}_2\text{-2}$ , (b)  $\gamma\text{-Fe}_2\text{O}_3@\text{SiO}_2\text{-NH}_2$ , (c)  $\gamma\text{-Fe}_2\text{O}_3@\text{SiO}_2\text{-NH}_2\text{-V}$  and (d)  $[\text{VO}(\text{acac})_2]$ .

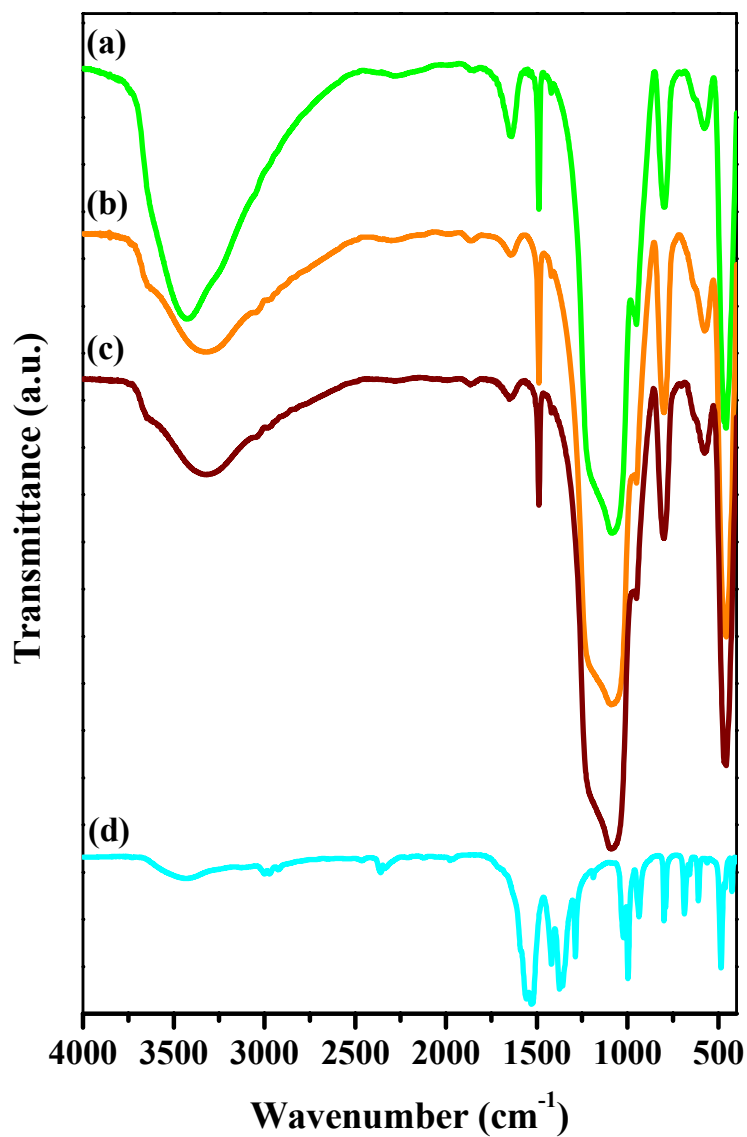

**Equation S1: Estimation of  $\gamma$ -Fe<sub>2</sub>O<sub>3</sub> nanoparticles size by XRD**

The average particles size of the uncoated  $\gamma$ -Fe<sub>2</sub>O<sub>3</sub>,  $d_{\text{XRD}}$ , was estimated from the FWHM of the (311) reflection, using the Debye-Scherrer equation:<sup>1</sup>

$$d_{\text{XRD}} = \frac{K\lambda}{\beta \cos \theta}$$

where  $K$  is the Debye-Scherrer constant ( $K = 0.9$  for spherical shape),  $\lambda$  is the wavelength of the Cu K $\alpha$  radiation,  $\beta$  is the FWHM and  $\theta$  is the Bragg angle.

- 1 R. E. Dinnebier, S. J. L. Billinge (Eds.), *Powder Diffraction: Theory and Practice*, RSC Publishing, Cambridge, UK, 2008.
